# Supplementary material
Source: publisher site journal article supplement (https://www.dovepress.com/article/supplementary_file/599334/599334%20Revised%20Supplementary%20Materials_0521.docx)
Supplement: Supplementary file 1 [file 599334%20Revised%20Supplementary%20Materials_0521.docx]

**Supplementary Table S1** Generalized Estimating Equation Analysis of Temporal Trends in Inflammatory, Immune-Metabolic, and Vascular Markers

| **Variables** | **β** | **SE** | **95% CI** | **p-value** |
| --- | --- | --- | --- | --- |
| **Hemoglobin** | | | | |
| Intercept | 13.62 | 0.26 | 13.11, 14.13 | <0.001 |
| CCRT vs. OP | −0.80 | 0.51 | −1.80, 0.19 | 0.112 |
| CCRT + UFUR vs. OP | −0.95 | 0.51 | −2.09, 0.08 | 0.063 |
| Week 2 | −0.60 | 0.18 | −0.95, −0.25 | <0.001 |
| Week 12 | −0.30 | 0.24 | −0.77, 0.17 | 0.211 |
| Week 24 | 0.10 | 0.22 | −0.33, 0.53 | 0.648 |
| CCRT × Week 2 | −0.09 | 0.27 | −0.62, 0.44 | 0.738 |
| CCRT × Week 12 | −1.95 | 0.35 | −2.64, −1.26 | <0.001 |
| CCRT × Week 24 | −0.55 | 0.32 | −1.18, 0.08 | 0.087 |
| CCRT + UFUR × Week 2 | −0.09 | 0.29 | −0.66, 0.48 | 0.756 |
| CCRT + UFUR × Week 12 | −1.85 | 0.37 | −2.57, −1.13 | <0.001 |
| CCRT + UFUR × Week 24 | −0.52 | 0.35 | −1.12, 0.17 | 0.139 |
| **NLR** | | | | |
| Intercept | 3.70 | 0.50 | 2.72, 4.68 | <0.001 |
| CCRT vs. OP | 0.40 | 0.63 | −0.83, 1.63 | 0.526 |
| CCRT + UFUR vs. OP | 0.25 | 0.67 | −1.06, 1.56 | 0.709 |
| Week 2 | 1.85 | 0.38 | 1.11, 2.59 | <0.001 |
| Week 12 | 0.45 | 0.45 | −0.43, 1.33 | 0.318 |
| Week 24 | 0.15 | 0.48 | −0.79, 1.09 | 0.754 |
| CCRT × Week 2 | 1.20 | 0.55 | 0.12, 2.28 | 0.029 |
| CCRT × Week 12 | 4.90 | 1.32 | 2.31, 7.49 | <0.001 |
| CCRT × Week 24 | 0.40 | 1.42 | −2.38, 3.18 | 0.778 |
| CCRT + UFUR × Week 2 | 1.35 | 0.58 | 0.21, 2.49 | 0.020 |
| CCRT + UFUR × Week 12 | 4.85 | 1.38 | 2.14, 7.56 | <0.001 |
| CCRT + UFUR × Week 24 | 0.50 | 1.58 | −2.60, 3.60 | 0.752 |
| **SII** | | | | |
| Intercept | 1005.0 | 244.0 | 527.0, 1483.0 | <0.001 |
| CCRT vs. OP | −150.0 | 256.0 | −652.0, 352.0 | 0.558 |
| CCRT + UFUR vs. OP | −215.0 | 251.0 | −707.0, 277.0 | 0.392 |
| Week 2 | 485.0 | 165.0 | 161.6, 808.4 | 0.003 |

**Supplementary Table S1** (Continued).

| **Variables** | **β** | **SE** | **95% CI** | **p-value** |
| --- | --- | --- | --- | --- |
| Week 12 | 80.0 | 180.0 | −272.8, 432.8 | 0.657 |
| Week 24 | 120.0 | 191.0 | −254.3, 494.3 | 0.530 |
| CCRT × Week 2 | 320.0 | 245.0 | −160.2, 800.2 | 0.192 |
| CCRT × Week 12 | 890.0 | 278.0 | 149.4, 1630.6 | 0.019 |
| CCRT × Week 24 | 100.0 | 346.0 | −774.1, 974.1 | 0.823 |
| CCRT + UFUR × Week 2 | 375.0 | 258.0 | −130.8, 880.8 | 0.146 |
| CCRT + UFUR × Week 12 | 980.0 | 291.0 | 213.6, 1746.4 | 0.012 |
| CCRT + UFUR × Week 24 | 90.0 | 346.0 | −820.6, 990.6 | 0.854 |
| **PNI** | | | | |
| Intercept | 40.60 | 0.66 | 39.31, 41.89 | <0.001 |
| CCRT vs. OP | −1.20 | 0.93 | −3.02, 0.62 | 0.197 |
| CCRT + UFUR vs. OP | −1.10 | 1.02 | −3.10, 0.90 | 0.281 |
| Week 2 | −2.15 | 0.45 | −3.03, −1.27 | <0.001 |
| Week 12 | −4.30 | 0.60 | −5.47, −3.13 | <0.001 |
| Week 24 | −0.80 | 0.56 | −1.90, 0.30 | 0.154 |
| CCRT × Week 2 | −0.35 | 0.68 | −1.68, 0.98 | 0.607 |
| CCRT × Week 12 | 0.70 | 0.86 | −0.98, 2.38 | 0.415 |
| CCRT × Week 24 | 0.25 | 0.94 | −1.59, 2.09 | 0.790 |
| CCRT + UFUR × Week 2 | −0.45 | 0.72 | −1.86, 0.96 | 0.532 |
| CCRT + UFUR × Week 12 | 0.40 | 0.93 | −1.42, 2.22 | 0.668 |
| CCRT + UFUR × Week 24 | 0.30 | 1.04 | −1.74, 2.34 | 0.773 |
| **ASI** | | | | |
| Intercept | 71.50 | 4.80 | 62.09, 80.91 | <0.001 |
| CCRT vs. OP | −1.70 | 6.88 | −15.19, 11.79 | 0.805 |
| CCRT + UFUR vs. OP | −3.10 | 6.81 | −16.45, 10.25 | 0.649 |
| Week 2 | 0.50 | 1.88 | −3.18, 4.18 | 0.790 |
| Week 12 | −1.30 | 2.12 | −5.45, 2.85 | 0.540 |
| Week 24 | −1.70 | 2.22 | −6.05, 2.65 | 0.444 |
| CCRT × Week 2 | 2.65 | 3.35 | −3.91, 9.21 | 0.429 |
| CCRT × Week 12 | 10.45 | 4.28 | 2.06, 18.84 | 0.015 |
| CCRT × Week 24 | 1.85 | 4.68 | −7.32, 11.02 | 0.693 |
| CCRT + UFUR × Week 2 | 2.95 | 3.48 | −3.87, 9.77 | 0.397 |

**Supplementary Table S1** (Continued).

| **Variables** | **β** | **SE** | **95% CI** | **p-value** |
| --- | --- | --- | --- | --- |
| CCRT + UFUR × Week 12 | 11.80 | 4.42 | 3.13, 20.47 | 0.008 |
| CCRT + UFUR × Week 24 | 2.20 | 4.88 | −7.36, 11.76 | 0.652 |
| **baPWV** | | | | |
| Intercept | 15.45 | 0.63 | 14.22, 16.68 | <0.001 |
| CCRT vs. OP | −0.25 | 0.93 | −2.07, 1.57 | 0.788 |
| CCRT + UFUR vs. OP | 0.20 | 0.96 | −1.68, 2.08 | 0.835 |
| Week 2 | 0.10 | 0.35 | −0.59, 0.79 | 0.775 |
| Week 12 | 0.05 | 0.40 | −0.73, 0.83 | 0.900 |
| Week 24 | 0.10 | 0.43 | −0.74, 0.94 | 0.816 |
| CCRT × Week 2 | 0.55 | 0.60 | −0.63, 1.73 | 0.361 |
| CCRT × Week 12 | 2.00 | 0.88 | 0.28, 3.72 | 0.015 |
| CCRT × Week 24 | 0.45 | 0.95 | −1.41, 2.31 | 0.636 |
| CCRT + UFUR × Week 2 | 0.65 | 0.64 | −0.60, 1.90 | 0.310 |
| CCRT + UFUR × Week 12 | 2.20 | 0.92 | 0.40, 4.00 | 0.008 |
| CCRT + UFUR × Week 24 | 0.55 | 1.02 | −1.45, 2.55 | 0.590 |

**Notes:** Reference categories were the surgery-alone group and baseline (week 0). Interaction terms represent differential changes over time. Models were adjusted for clinical stage (III–IV vs. I–II).
**Abbreviations:** ASI, Arterial stiffness index; baPWV, Brachial–ankle pulse wave velocity; CCRT, Concurrent chemoradiotherapy; CI, Confidence interval; NLR, Neutrophil-to-lymphocyte ratio; PNI, Prognostic nutritional index; SE, Standard error; SII, Systemic immune-inflammation index.

**Supplementary Table S2** Postoperative Complications and Grade ≥ 3 CCRT-Related Toxicities

|  | **OP**  **(n = 60)** | **OP + CCRT**  **(n = 40)** | **OP + CCRT +**  **UFUR (n = 40)** |
| --- | --- | --- | --- |
| OP complications (n, %) |  |  |  |
| Infections | 12 (20.0) | 10 (25.0) | 12 (30.0) |
| Reoperation | 7 (11.7) | 9 (22.5) | 11 (27.5) |
| Clavien–Dindo ≥ III | 11 (18.3) | 12 (30.0) | 13 (32.5) |
| CCRT-related toxicities (Grade ≥ 3) (n, %) |  |  |  |
| Anemia | N/A | 6 (15.0) | 6 (15.0) |
| Leukopenia | N/A | 7 (17.5) | 8 (20.0) |
| Febrile neutropenia | N/A | 5 (12.5) | 6 (15.0) |
| Mucositis | N/A | 25 (62.5) | 28 (70.0) |
| Dysphagia | N/A | 10 (25.0) | 12 (30.0) |
| Thrombotic events (n, %) | 0 (0) | 0 (0) | 0 (0) |

**Abbreviations:** CCRT, Concurrent chemoradiotherapy; N/A, Not applicable; OP, Operation.

**Supplementary Table S3**Receiver Operating Characteristic Analysis of Inflammatory and Immune-Metabolic Biomarkers Predicting Postoperative Complications and CCRT-Related Toxicities

| **Outcome** | **Parameter** | **AUC** | **Sensitivity**  **(%)** | **Specificity**  **(%)** | **Cutoff**  **value** |
| --- | --- | --- | --- | --- | --- |
| **Surgery-related complications** |  |  |  |  |  |
| Infection | NLR | 0.707 | 90.0 | 54.4 | 3.5 |
| PNI | 0.631 | 76.7 | 50.0 | 40.2 |
| Clavien–Dindo ≥ III | PNI | 0.640 | 90.8 | 59.8 | 40.5 |
| Reoperation | PNI | 0.651 | 83.3 | 42.5 | 41.4 |
| **CCRT-related toxicities** |  |  |  |  |  |
| Febrile neutropenia | NLR | 0.688 | 63.6 | 72.4 | 3.1 |
| Serum uric acid | 0.695 | 81.8 | 57.5 | 5.5 |
| Mucositis (Grade ≥ 3) | SII | 0.660 | 81.6 | 50.0 | 1100.0 |
|  | Serum uric acid | 0.709 | 71.1 | 63.6 | 5.3 |

**Notes:** Cutoff value represents the threshold that maximizes the sum of sensitivity and specificity (Youden index).

**Abbreviations:**AUC, Area under the receiver operating characteristic curve; CCRT, Concurrent chemoradiotherapy; NLR, Neutrophil-to-lymphocyte ratio; PNI, Prognostic nutritional index; SII, Systemic immune-inflammation index.

**Supplementary Figure S1** Receiver Operating Characteristic Curves of Biomarkers for Predicting

Treatment-Related Severe Complications
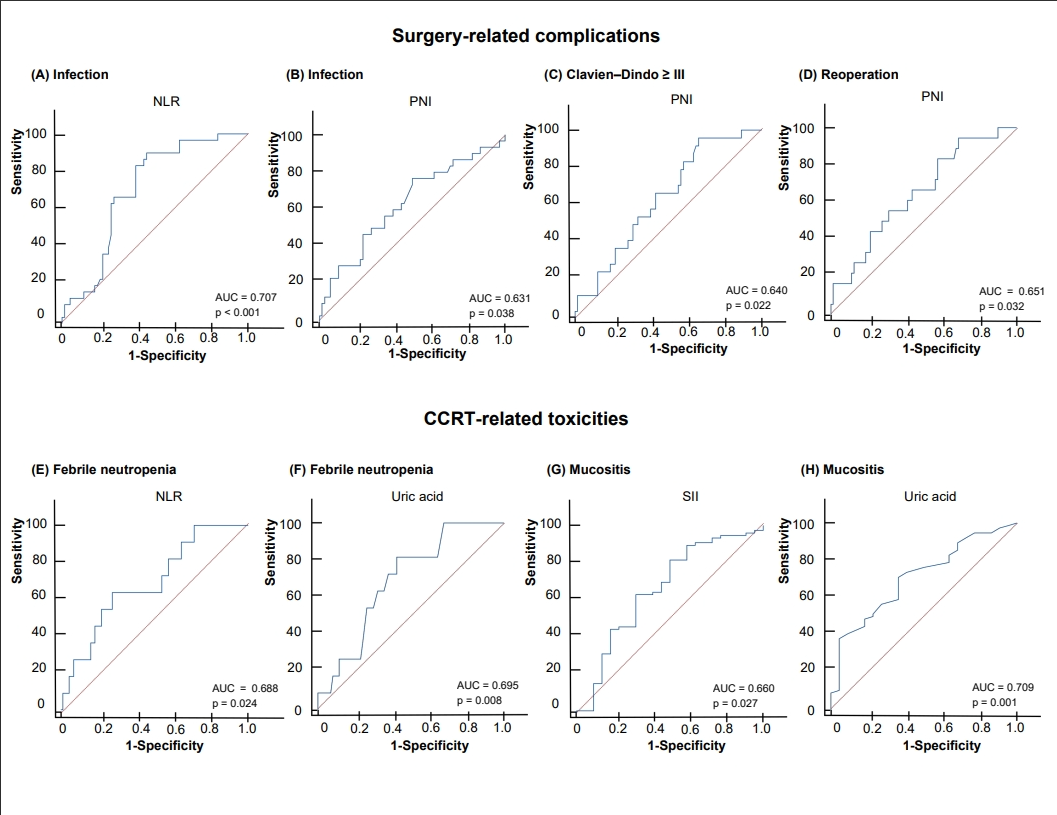


**Notes:** Surgery-related complications: (A) NLR for postoperative infection; (B) PNI for postoperative infection; (C) PNI for Clavien–Dindo ≥ III; (D) PNI for reoperation.

CCRT-related toxicities: (E) NLR for febrile neutropenia; (F) Serum uric acid for febrile neutropenia; (G) SII for grade ≥ 3 mucositis; (H) Serum uric acid for grade ≥ 3 mucositis.

**Abbreviations:** AUC, Area under the receiver operating characteristic curve;

CCRT, Concurrent chemoradiotherapy; NLR, Neutrophil-to-lymphocyte ratio;

PNI, Prognostic nutritional index; SII, Systemic immune-inflammation index.
